# Supplementary material
Source: Springer Nature journal article supplement (https://www.springermedizin.de/resource/supplementary/12913_2012_2179_MOESM1_ESM.pdf/9530060)
Supplement: MOESM1 [file 9530060]

Referral to the Sclerosis Hospitals and initial screening based on returned forms

Written information about the study and invitation to participate

Clinical pre-assessment and oral information about study

Decision to participate and baseline assessment

Randomization

Intervention group  
(early admission)

Control group  
(usual admission)
